# Supplementary material for: Identification of Differentially Expressed Genes in Cervical Cancer Patients by Comparative Transcriptome Analysis
Source: PubMed Central journal article supplement (PMC8004372; doi:10.1155/2021/8810074), 2021-03-19

100 bp M

C

+ve

1

2

3

4

NTC

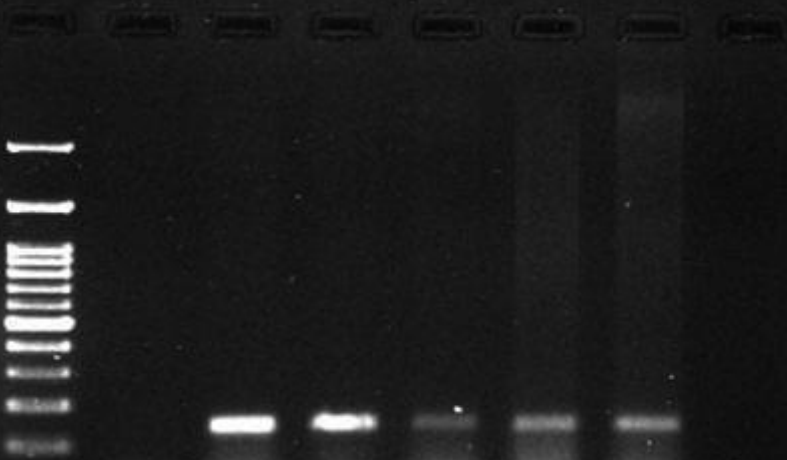

Supplement: 8810074.f1.pdf [file 8810074.f1.pdf]
